# Supplementary material for: Process simulation and economic evaluation of the industrial production of short-chain polyglycerol oligomers
Source: Royal Society of Chemistry journal article supplement (doi:10.1039/d3se00345k), 2023-01-01
Supplement: d3se00345k1.pdf [file d3se00345k1.pdf]

**Supplementary Information for “Process Simulation and Economic Evaluation of  
the Industrial Production of Short-Chain Polyglycerol Oligomers”**

Livia G. N. de Oliveira <sup>1</sup>, Raquel M. Cavalcante <sup>2</sup> and André F. Young <sup>1\*</sup>

<sup>1</sup> Departamento de Engenharia Química e de Petróleo, Universidade Federal Fluminense,  
Rua Passo da Pátria, 156, Niterói, Brazil.

<sup>2</sup> Escola de Química, Universidade Federal do Rio de Janeiro, Av. Athos da Silveira  
Ramos, 149, Rio de Janeiro, Brazil.

\* ayoung@id.uff.br

**Contents**

This document presents:

- 13 pages;
- 6 equations;
- 4 tables.

## S.1- Lang method

The methodology used to calculate the capital costs was the Lang Method, explained in detail by Seider et al.<sup>1</sup> To apply the method, it is necessary to estimate the f.o.b. purchase price for each piece of equipment, which are calculated by empirical equations. In addition, as these formulas were designed for another time, prices must be updated to the current time. This is done by means of the Plant Cost Index. Once this is done, all the f.o.b. prices are summed up and the result is multiplied by 1.05, to account for the delivery of the equipment to the plant site. Finally, the result must be multiplied by the appropriate Lang factor,  $f_L$ , to obtain the total fixed investment. Equation S.1 summarizes the described procedure.

$$I_F = 1.05 \times f_L \times \sum_i \left( \frac{PCI}{PCI_b} \right) C_i \quad (\text{S.1})$$

In this equation,  $I_F$  is the fixed investment;  $f_L$  is the Lang factor;  $PCI$  is the Plant Cost Index for the project year;  $PCI_b$  is the Plant Cost Index for the base year;  $C_i$  is the f.o.b. purchase price of equipment  $i$ .

The formulas for calculating the f.o.b. process were obtained in Seider et al.<sup>1</sup> and refer to the year 2013, whose  $PCI_b$  value was 567. All of them were updated to the latest  $PCI$  available at the time of this analysis, for the month of September 2021, whose value was equal to 754.7.

The Lang factor takes into account the costs of installation, instrumentation and control, plumbing, electrical network, auxiliary buildings, land acquisition, construction costs, involved engineering and fees. For plants that process only fluids, the Lang factor is equal to 5.04. To obtain the total investment, the working capital, considered 15% of the total investment, must be added to the fixed investment.<sup>1</sup> In this work, it was assumed

that the construction of the plant would take place over three years, with investments of 30%, 40% and 30% distributed over the years.

## **S.2- Production cost calculation**

Production costs were estimated according to the methodology of Turton et al.<sup>2</sup> The total production cost is the cost related to the day-to-day operation of a plant, and can be divided into three categories: direct costs, indirect costs and general expenses. Direct costs include the cost of acquiring raw materials, purchasing catalysts and solvents, operating labor, technical supervision, utilities, effluent disposal, maintenance and repairs, operating supplies, laboratory charges, patents and royalties. Indirect costs include material packaging and storage, local taxes and insurance. These costs do not depend on the production level. Finally, general expenses include administrative costs, product distribution and sales, research and development.

For the material costs, the inlet/outlet flow rates were multiplied by the price of each material, and the operating labor cost is the product between the average salary of operators and the number of workers that the plant demands, calculated with Equation S.2:<sup>2</sup>

$$N_{OL} = (6.29 + 31.7N_S^2 + 0.23N_{NS})^{0.5} \quad (\text{S. 2})$$

where  $N_{OL}$  is the number of workers per shift;  $N_S$  is the number of processes involving solids, which is zero in this work;  $N_{NS}$  is the number of processes that do not involve particulate solids. This count includes columns, reactors and heat exchangers. Pumps and vessels are not accounted for.<sup>2</sup>

The other costs are then estimated as a function of these costs and the fixed investment, according to the relations shown in Table S.1.

**Table S.1.** Production cost relations.<sup>2</sup>

| <b>Cost</b>                   | <b>Type</b>     | <b>Relation</b>                                                            |
|-------------------------------|-----------------|----------------------------------------------------------------------------|
| Technical supervision         | Direct          | 18% of operating labor                                                     |
| Maintenance and repairs       | Direct          | 6% of fixed investment                                                     |
| Operating supplies            | Direct          | 15% of maintenance and repairs                                             |
| Laboratory charges            | Direct          | 15% of operating labor                                                     |
| Patents and royalties         | Direct          | 3% of the total production cost                                            |
| Packaging and storage         | Indirect        | 6% of (operating labor + technical supervision + maintenance and repairs)  |
| Local taxes                   | Indirect        | 3.2% of fixed investment                                                   |
| Insurance                     | Indirect        | 0.5% of fixed investment                                                   |
| Administrative costs          | General expense | 15% de (operating labor + technical supervision + maintenance and repairs) |
| Product distribution and sale | General expense | 11% of the total production cost                                           |
| Research and development      | General expense | 5% of the total production cost                                            |

### **S.3- Additional modeling considerations**

#### **S.3.1- Reaction phase definition**

In the simulator, reaction phase was chosen as “overall” because, although the reaction is known to be processed in the liquid phase, the authors do not seem to have considered only the volume of this phase in the kinetic model proposition, but the entire reactor volume. This assumption arose because, during the simulations, when “combined liquid” was chosen as reaction phase, it was not possible to obtain conversions above 69%.

#### **S.3.2- Calculation of non-glycerol inlet flow rates**

For the calculation of the mass flow rates of water, catalyst and argon that enter the process, it was necessary to divide the average mass flow of glycerol produced by a plant, that is, 1,558.65 kg/h, by the mass of glycerol used by Richter et al.,<sup>3</sup> which is 0.05 kg. The result (31,172.99) is the ratio factor by which the article quantities were multiplied, resulting in 15.54 kg/h for water and 50.05 kg/h for argon. The amount of catalyst was established as 0.4% of the glycerol mass, resulting in 6.23 kg/h.

## S.4- Stream property tables

**Table S.2.** Process streams for the maximum diglycerol production configuration.

| <b>Stream</b>      | <b>Glycerol Inlet</b> | <b>Glycerol Recycle</b> | <b>Argon Inlet</b> | <b>Argon Recycle</b>      | <b>Water</b> |
|--------------------|-----------------------|-------------------------|--------------------|---------------------------|--------------|
| Temperature (°C)   | 25                    | 25                      | 25                 | 25                        | 25           |
| Pressure (kPa)     | 101.3                 | 101.3                   | 101.3              | 101.3                     | 101.3        |
| Vapor fraction     | 0                     | 0                       | 1                  | 1                         | 0            |
| Flow rate (kg/h)   | 1559                  | 1687                    | 0.1257             | 104.1                     | 32.36        |
| Enthalpy (kcal/kg) | -1761                 | -1761                   | -                  | -5.591 x 10 <sup>-2</sup> | -3780        |
| Mass fractions     |                       |                         |                    |                           |              |
| Glycerol           | 0.9990                | 0.9990                  | 0.0000             | 0.0000                    | 0.0000       |
| Argon              | 0.0000                | 0.0000                  | 1.0000             | 1.0000                    | 0.0000       |
| Water              | 0.0010                | 0.0010                  | 0.0000             | 0.0000                    | 0.0000       |
| Cesium bicarbonate | 0.0000                | 0.0000                  | 0.0000             | 0.0000                    | 0.0000       |
| Diglycerol         | 0.0000                | 0.0000                  | 0.0000             | 0.0000                    | 0.0000       |
| Triglycerol        | 0.0000                | 0.0000                  | 0.0000             | 0.0000                    | 0.0000       |
| Tetraglycerol      | 0.0000                | 0.0000                  | 0.0000             | 0.0000                    | 0.0000       |
| Larger oligomers   | 0.0000                | 0.0000                  | 0.0000             | 0.0000                    | 0.0000       |
| <b>Stream</b>      | <b>Catalyst</b>       | <b>Glycerol</b>         | <b>Argon</b>       | <b>Water + Catalyst</b>   | <b>1</b>     |
| Temperature (°C)   | 25                    | 25                      | 25                 | 25                        | 260          |
| Pressure (kPa)     | 101.3                 | 101.3                   | 101.3              | 101.3                     | 101.3        |
| Vapor fraction     | 0                     | 0                       | 1                  | 0                         | 0            |
| Flow rate (kg/h)   | 12.99                 | 3246                    | 104.2              | 45.35                     | 3246         |
| Enthalpy (kcal/kg) | -1005                 | -1761                   | -                  | -2985                     | -1601        |
| Mass fractions     |                       |                         |                    |                           |              |
| Glycerol           | 0.0000                | 0.9990                  | 0.0000             | 0.0000                    | 0.9990       |
| Argon              | 0.0000                | 0.0000                  | 1.0000             | 0.0000                    | 0.0000       |
| Water              | 0.0000                | 0.0010                  | 0.0000             | 0.7136                    | 0.0010       |
| Cesium bicarbonate | 1.0000                | 0.0000                  | 0.0000             | 0.2864                    | 0.0000       |
| Diglycerol         | 0.0000                | 0.0000                  | 0.0000             | 0.0000                    | 0.0000       |
| Triglycerol        | 0.0000                | 0.0000                  | 0.0000             | 0.0000                    | 0.0000       |
| Tetraglycerol      | 0.0000                | 0.0000                  | 0.0000             | 0.0000                    | 0.0000       |
| Larger oligomers   | 0.0000                | 0.0000                  | 0.0000             | 0.0000                    | 0.0000       |
| <b>Stream</b>      | <b>2</b>              | <b>3</b>                | <b>4</b>           | <b>5</b>                  | <b>6</b>     |
| Temperature (°C)   | 260                   | 260                     | 260                | 260                       | 105          |
| Pressure (kPa)     | 101.3                 | 101.3                   | 101.3              | 101.3                     | 101.3        |
| Vapor fraction     | 1                     | 1                       | 1                  | 0                         | 0            |
| Flow rate (kg/h)   | 104.2                 | 45.35                   | 776.3              | 2619                      | 616.2        |
| Enthalpy (kcal/kg) | 29.20                 | -2322                   | -1551              | -986.9                    | -2039        |
| Mass fractions     |                       |                         |                    |                           |              |
| Glycerol           | 0.0000                | 0.0000                  | 0.5774             | 0.4717                    | 0.7273       |
| Argon              | 1.0000                | 0.0000                  | 0.1341             | 0.0000                    | 0.0000       |
| Water              | 0.0000                | 0.7136                  | 0.2283             | 0.0041                    | 0.2043       |
| Cesium bicarbonate | 0.0000                | 0.2864                  | 0.0160             | 0.0002                    | 0.0126       |
| Diglycerol         | 0.0000                | 0.0000                  | 0.0442             | 0.5239                    | 0.0557       |
| Triglycerol        | 0.0000                | 0.0000                  | 0.0000             | 0.0000                    | 0.0000       |
| Tetraglycerol      | 0.0000                | 0.0000                  | 0.0000             | 0.0000                    | 0.0000       |
| Larger oligomers   | 0.0000                | 0.0000                  | 0.0000             | 0.0000                    | 0.0000       |

**Table S.2.** Process streams for the maximum diglycerol production configuration  
(continuation).

| <b>Stream</b>      | <b>7</b>                  | <b>8</b>  | <b>9</b>  | <b>10</b> | <b>11</b> |
|--------------------|---------------------------|-----------|-----------|-----------|-----------|
| Temperature (°C)   | 105                       | 0         | 0         | 0         | 0         |
| Pressure (kPa)     | 101.3                     | 101.3     | 101.3     | 101.3     | 101.3     |
| Vapor fraction     | 1                         | 1         | 0         | 1         | 0         |
| Flow rate (kg/h)   | 160.1                     | 104.4     | 55.72     | 104.1     | 0.2904    |
| Enthalpy (kcal/kg) | -1024                     | -11.42    | -3575     | -3.173    | -3552     |
| Mass fractions     |                           |           |           |           |           |
| Glycerol           | 0.0004                    | 0.0000    | 0.0011    | 0.0000    | 0.0000    |
| Argon              | 0.6502                    | 0.9972    | 0.0000    | 1.0000    | 0.0000    |
| Water              | 0.3208                    | 0.0025    | 0.9170    | 0.0000    | 0.9089    |
| Cesium bicarbonate | 0.0287                    | 0.0003    | 0.0819    | 0.0000    | 0.0911    |
| Diglycerol         | 0.0000                    | 0.0000    | 0.0000    | 0.0000    | 0.0000    |
| Triglycerol        | 0.0000                    | 0.0000    | 0.0000    | 0.0000    | 0.0000    |
| Tetraglycerol      | 0.0000                    | 0.0000    | 0.0000    | 0.0000    | 0.0000    |
| Larger oligomers   | 0.0000                    | 0.0000    | 0.0000    | 0.0000    | 0.0000    |
| <b>Stream</b>      | <b>12</b>                 | <b>13</b> | <b>14</b> | <b>15</b> | <b>16</b> |
| Temperature (°C)   | 25                        | 209.8     | 254.1     | 254.1     | 254.1     |
| Pressure (kPa)     | 101.3                     | 101.3     | 101.3     | 101.3     | 101.3     |
| Vapor fraction     | 1                         | 0.1493    | 1         | 0         | 0.2747    |
| Flow rate (kg/h)   | 104.1                     | 3235      | 351.0     | 2884      | 3235      |
| Enthalpy (kcal/kg) | -5.591 x 10 <sup>-2</sup> | -1187     | -1953     | -1045     | -1143     |
| Mass fractions     |                           |           |           |           |           |
| Glycerol           | 0.0000                    | 0.5204    | 0.5920    | 0.5117    | 0.5204    |
| Argon              | 1.0000                    | 0.0000    | 0.0003    | 0.0000    | 0.0000    |
| Water              | 0.0000                    | 0.0422    | 0.3493    | 0.0061    | 0.0434    |
| Cesium bicarbonate | 0.0000                    | 0.0026    | 0.0215    | 0.0003    | 0.0026    |
| Diglycerol         | 0.0000                    | 0.4347    | 0.0366    | 0.4588    | 0.4130    |
| Triglycerol        | 0.0000                    | 0.0000    | 0.0003    | 0.0094    | 0.0084    |
| Tetraglycerol      | 0.0000                    | 0.0000    | 0.0000    | 0.0000    | 0.0000    |
| Larger oligomers   | 0.0000                    | 0.0000    | 0.0000    | 0.0137    | 0.0122    |
| <b>Stream</b>      | <b>17</b>                 | <b>18</b> | <b>19</b> | <b>20</b> | <b>21</b> |
| Temperature (°C)   | 185.7                     | 165.0     | 53.08     | 193.2     | 185.4     |
| Pressure (kPa)     | 3                         | 3         | 3         | 3         | 3         |
| Vapor fraction     | 0.5338                    | 0.3157    | 1         | 0         | 1         |
| Flow rate (kg/h)   | 3235                      | 3235      | 148.9     | 3086      | 1683      |
| Enthalpy (kcal/kg) | -1143                     | -1197     | -3036     | -1109     | -1462     |
| Mass fractions     |                           |           |           |           |           |
| Glycerol           | 0.5204                    | 0.5204    | 0.0005    | 0.5455    | 1.0000    |
| Argon              | 0.0000                    | 0.0000    | 0.0008    | 0.0000    | 0.0000    |
| Water              | 0.0434                    | 0.0434    | 0.9423    | 0.0000    | 0.0000    |
| Cesium bicarbonate | 0.0026                    | 0.0026    | 0.0564    | 0.0000    | 0.0000    |
| Diglycerol         | 0.4130                    | 0.4130    | 0.0000    | 0.4329    | 0.0000    |
| Triglycerol        | 0.0084                    | 0.0084    | 0.0000    | 0.0088    | 0.0000    |
| Tetraglycerol      | 0.0000                    | 0.0000    | 0.0000    | 0.0000    | 0.0000    |
| Larger oligomers   | 0.0122                    | 0.0122    | 0.0000    | 0.0128    | 0.0000    |

**Table S.2.** Process streams for the maximum diglycerol production configuration  
(continuation).

| <b>Stream</b>      | <b>22</b> | <b>23</b>                | <b>24</b> | <b>25</b> | <b>26</b> |
|--------------------|-----------|--------------------------|-----------|-----------|-----------|
| Temperature (°C)   | 185.8     | 185.8                    | 25.0      | 25.04     | 0.2116    |
| Pressure (kPa)     | 3         | 3                        | 3         | 101.3     | 101.3     |
| Vapor fraction     | 1         | 1                        | 0         | 0         | 0         |
| Flow rate (kg/h)   | 1683      | 4.848 x 10 <sup>-2</sup> | 1683      | 1683      | 0.1655    |
| Enthalpy (kcal/kg) | -1462     | -3098                    | -1759     | -1759     | -3804     |
| Mass fractions     |           |                          |           |           |           |
| Glycerol           | 1.0000    | 0.0000                   | 1.0000    | 1.0000    | 0.0000    |
| Argon              | 0.0000    | 0.0000                   | 0.0000    | 0.0000    | 0.0000    |
| Water              | 0.0000    | 0.9865                   | 0.0000    | 0.0000    | 1.0000    |
| Cesium bicarbonate | 0.0000    | 0.0080                   | 0.0000    | 0.0000    | 0.0000    |
| Diglycerol         | 0.0000    | 0.0055                   | 0.0000    | 0.0000    | 0.0000    |
| Triglycerol        | 0.0000    | 0.0000                   | 0.0000    | 0.0000    | 0.0000    |
| Tetraglycerol      | 0.0000    | 0.0000                   | 0.0000    | 0.0000    | 0.0000    |
| Larger oligomers   | 0.0000    | 0.0000                   | 0.0000    | 0.0000    | 0.0000    |
| <b>Stream</b>      | <b>27</b> | <b>28</b>                | <b>29</b> | <b>30</b> | <b>31</b> |
| Temperature (°C)   | 25        | 260.5                    | 226.9     | 200       | 226.2     |
| Pressure (kPa)     | 101.3     | 3                        | 1         | 1         | 1         |
| Vapor fraction     | 0         | 0                        | 0.2414    | 0         | 1         |
| Flow rate (kg/h)   | 1685      | 1403                     | 1403      | 1403      | 1336      |
| Enthalpy (kcal/kg) | -1761     | -415.6                   | -415.6    | -457.1    | -340.7    |
| Mass fractions     |           |                          |           |           |           |
| Glycerol           | 0.9990    | 0.0001                   | 0.0001    | 0.0001    | 0.0001    |
| Argon              | 0.0000    | 0.0000                   | 0.0000    | 0.0000    | 0.0000    |
| Water              | 0.0010    | 0.0000                   | 0.0000    | 0.0000    | 0.0000    |
| Cesium bicarbonate | 0.0000    | 0.0000                   | 0.0000    | 0.0000    | 0.0000    |
| Diglycerol         | 0.0000    | 0.9524                   | 0.9524    | 0.9524    | 0.9998    |
| Triglycerol        | 0.0000    | 0.0193                   | 0.0193    | 0.0193    | 0.0001    |
| Tetraglycerol      | 0.0000    | 0.0000                   | 0.0000    | 0.0000    | 0.0000    |
| Larger oligomers   | 0.0000    | 0.0281                   | 0.0281    | 0.0281    | 0.0000    |
| <b>Stream</b>      | <b>32</b> | <b>33</b>                | <b>34</b> | <b>35</b> |           |
| Temperature (°C)   | 265.4     | 211.0                    | 125.8     | 296.8     |           |
| Pressure (kPa)     | 1.0       | 0.005                    | 0.005     | 0.005     |           |
| Vapor fraction     | 0         | 0.5165                   | 1.0       | 0         |           |
| Flow rate (kg/h)   | 66.44     | 66.44                    | 26.93     | 39.51     |           |
| Enthalpy (kcal/kg) | -410.5    | -410.5                   | -393.2    | -411.0    |           |
| Mass fractions     |           |                          |           |           |           |
| Glycerol           | 0.0000    | 0.0000                   | 0.0000    | 0.0000    |           |
| Argon              | 0.0000    | 0.0000                   | 0.0000    | 0.0000    |           |
| Water              | 0.0000    | 0.0000                   | 0.0000    | 0.0000    |           |
| Cesium bicarbonate | 0.0000    | 0.0000                   | 0.0000    | 0.0000    |           |
| Diglycerol         | 0.0001    | 0.0001                   | 0.0001    | 0.0000    |           |
| Triglycerol        | 0.4056    | 0.4056                   | 0.9999    | 0.0006    |           |
| Tetraglycerol      | 0.0000    | 0.0000                   | 0.0000    | 0.0000    |           |
| Larger oligomers   | 0.5944    | 0.5944                   | 0.0000    | 0.9994    |           |

**Table S.3.** Process streams for the maximum triglycerol production configuration.

| <b>Stream</b>      | <b>Glycerol Inlet</b> | <b>Glycerol Recycle</b> | <b>Argon Inlet</b> | <b>Argon Recycle</b>      | <b>Water</b> |
|--------------------|-----------------------|-------------------------|--------------------|---------------------------|--------------|
| Temperature (°C)   | 25                    | 25                      | 25                 | 25                        | 25           |
| Pressure (kPa)     | 101.3                 | 101.3                   | 101.3              | 101.3                     | 101.3        |
| Vapor fraction     | 0                     | 0                       | 1                  | 1                         | 0            |
| Flow rate (kg/h)   | 1559                  | 389.3                   | 8.390 x            | 62.47                     | 19.42        |
| Enthalpy (kcal/kg) | -1761                 | -1761                   | -5.591             | -5.589 x 10 <sup>-2</sup> | -3780        |
| Mass fractions     |                       |                         |                    |                           |              |
| Glycerol           | 0.9990                | 0.9990                  | 0.0000             | 0.0000                    | 0.0000       |
| Argon              | 0.0000                | 0.0000                  | 1.0000             | 1.0000                    | 0.0000       |
| Water              | 0.0010                | 0.0010                  | 0.0000             | 0.0000                    | 1.0000       |
| Cesium bicarbonate | 0.0000                | 0.0000                  | 0.0000             | 0.0000                    | 0.0000       |
| Diglycerol         | 0.0000                | 0.0000                  | 0.0000             | 0.0000                    | 0.0000       |
| Triglycerol        | 0.0000                | 0.0000                  | 0.0000             | 0.0000                    | 0.0000       |
| Tetraglycerol      | 0.0000                | 0.0000                  | 0.0000             | 0.0000                    | 0.0000       |
| Larger oligomers   | 0.0000                | 0.0000                  | 0.0000             | 0.0000                    | 0.0000       |
| <b>Stream</b>      | <b>Catalyst</b>       | <b>Glycerol</b>         | <b>Argon</b>       | <b>Water + Catalyst</b>   | <b>1</b>     |
| Temperature (°C)   | 25                    | 25                      | 25                 | 25                        | 260          |
| Pressure (kPa)     | 101.3                 | 101.3                   | 101.3              | 101.3                     | 101.3        |
| Vapor fraction     | 0                     | 0                       | 1                  | 0                         | 0            |
| Flow rate (kg/h)   | 7.794                 | 1948                    | 62.56              | 27.22                     | 1948         |
| Enthalpy (kcal/kg) | -1005                 | -1761                   | -                  | -2985                     | -1601        |
| Mass fractions     |                       |                         |                    |                           |              |
| Glycerol           | 0.0000                | 0.9990                  | 0.0000             | 0.0000                    | 0.9990       |
| Argon              | 0.0000                | 0.0000                  | 1.0000             | 0.0000                    | 0.0000       |
| Water              | 0.0000                | 0.0010                  | 0.0000             | 0.7136                    | 0.0010       |
| Cesium bicarbonate | 1.0000                | 0.0000                  | 0.0000             | 0.2864                    | 0.0000       |
| Diglycerol         | 0.0000                | 0.0000                  | 0.0000             | 0.0000                    | 0.0000       |
| Triglycerol        | 0.0000                | 0.0000                  | 0.0000             | 0.0000                    | 0.0000       |
| Tetraglycerol      | 0.0000                | 0.0000                  | 0.0000             | 0.0000                    | 0.0000       |
| Larger oligomers   | 0.0000                | 0.0000                  | 0.0000             | 0.0000                    | 0.0000       |
| <b>Stream</b>      | <b>2</b>              | <b>3</b>                | <b>4</b>           | <b>5</b>                  | <b>6</b>     |
| Temperature (°C)   | 260                   | 260                     | 260                | 260                       | 105          |
| Pressure (kPa)     | 101.3                 | 101.3                   | 101.3              | 101.3                     | 101.3        |
| Vapor fraction     | 1                     | 1                       | 1                  | 0                         | 0            |
| Flow rate (kg/h)   | 62.56                 | 27.22                   | 412.4              | 1625                      | 260.0        |
| Enthalpy (kcal/kg) | 29.20                 | -2322                   | -1738              | -619.0                    | -2102        |
| Mass fractions     |                       |                         |                    |                           |              |
| Glycerol           | 0.0000                | 0.0000                  | 0.3101             | 0.1605                    | 0.4919       |
| Argon              | 1.0000                | 0.0000                  | 0.1514             | 0.0001                    | 0.0000       |
| Water              | 0.0000                | 0.7136                  | 0.4046             | 0.0042                    | 0.3124       |
| Cesium bicarbonate | 0.0000                | 0.2864                  | 0.0182             | 0.0002                    | 0.0124       |
| Diglycerol         | 0.0000                | 0.0000                  | 0.1156             | 0.8351                    | 0.1833       |
| Triglycerol        | 0.0000                | 0.0000                  | 0.0000             | 0.0000                    | 0.0000       |
| Tetraglycerol      | 0.0000                | 0.0000                  | 0.0000             | 0.0000                    | 0.0000       |
| Larger oligomers   | 0.0000                | 0.0000                  | 0.0000             | 0.0000                    | 0.0000       |

**Table S.3.** Process streams for the maximum triglycerol production configuration  
(continuation).

| <b>Stream</b>      | <b>7</b>                  | <b>8</b>  | <b>9</b>  | <b>10</b> | <b>11</b> |
|--------------------|---------------------------|-----------|-----------|-----------|-----------|
| Temperature (°C)   | 105                       | 0         | 0         | 0         | 0         |
| Pressure (kPa)     | 101.3                     | 101.3     | 101.3     | 101.3     | 101.3     |
| Vapor fraction     | 1                         | 1         | 0         | 1         | 0         |
| Flow rate (kg/h)   | 152.4                     | 62.62     | 89.81     | 62.45     | 0.1735    |
| Enthalpy (kcal/kg) | -1791                     | -11.68    | -3671     | -3.173    | -3657     |
| Mass fractions     |                           |           |           |           |           |
| Glycerol           | 0.0002                    | 0.0000    | 0.0003    | 0.0000    | 0.0000    |
| Argon              | 0.4097                    | 0.9972    | 0.0000    | 1.0000    | 0.0000    |
| Water              | 0.5620                    | 0.0026    | 0.9520    | 0.0000    | 0.9469    |
| Cesium bicarbonate | 0.0281                    | 0.0001    | 0.0477    | 0.0000    | 0.0531    |
| Diglycerol         | 0.0000                    | 0.0000    | 0.0000    | 0.0000    | 0.0000    |
| Triglycerol        | 0.0000                    | 0.0000    | 0.0000    | 0.0000    | 0.0000    |
| Tetraglycerol      | 0.0000                    | 0.0000    | 0.0000    | 0.0000    | 0.0000    |
| Larger oligomers   | 0.0000                    | 0.0000    | 0.0000    | 0.0000    | 0.0000    |
| <b>Stream</b>      | <b>12</b>                 | <b>13</b> | <b>14</b> | <b>15</b> | <b>16</b> |
| Temperature (°C)   | 25                        | 212.2     | 254.1     | 254.1     | 254.1     |
| Pressure (kPa)     | 101.3                     | 101.3     | 101.3     | 101.3     | 101.3     |
| Vapor fraction     | 1                         | 0.2155    | 1         | 0         | 0.3865    |
| Flow rate (kg/h)   | 62.45                     | 1885      | 195.4     | 1690      | 1885      |
| Enthalpy (kcal/kg) | -5.589 x 10 <sup>-2</sup> | -823.5    | -2220     | -661.2    | -822.8    |
| Mass fractions     |                           |           |           |           |           |
| Glycerol           | 0.0000                    | 0.2062    | 0.3674    | 0.1876    | 0.2062    |
| Argon              | 1.0000                    | 0.0001    | 0.0006    | 0.0000    | 0.0001    |
| Water              | 0.0000                    | 0.0467    | 0.5352    | 0.0063    | 0.0612    |
| Cesium bicarbonate | 0.0000                    | 0.0019    | 0.0164    | 0.0002    | 0.0019    |
| Diglycerol         | 0.0000                    | 0.7452    | 0.0703    | 0.4907    | 0.4471    |
| Triglycerol        | 0.0000                    | 0.0000    | 0.0102    | 0.1432    | 0.1294    |
| Tetraglycerol      | 0.0000                    | 0.0000    | 0.0000    | 0.0789    | 0.0705    |
| Larger oligomers   | 0.0000                    | 0.0000    | 0.0000    | 0.0934    | 0.0837    |
| <b>Stream</b>      | <b>17</b>                 | <b>18</b> | <b>19</b> | <b>20</b> | <b>21</b> |
| Temperature (°C)   | 203.1                     | 165.0     | 53.12     | 207.4     | 185.4     |
| Pressure (kPa)     | 3                         | 3         | 3         | 3         | 3         |
| Vapor fraction     | 0.6055                    | 0.4240    | 1         | 0         | 1         |
| Flow rate (kg/h)   | 1885                      | 1885      | 118.9     | 1766      | 388.8     |
| Enthalpy (kcal/kg) | -822.8                    | -874.5    | -3110     | -710.8    | -1462     |
| Mass fractions     |                           |           |           |           |           |
| Glycerol           | 0.2062                    | 0.2062    | 0.0005    | 0.2201    | 0.9998    |
| Argon              | 0.0001                    | 0.0001    | 0.0009    | 0.0000    | 0.0000    |
| Water              | 0.0612                    | 0.0612    | 0.9691    | 0.0000    | 0.0001    |
| Cesium bicarbonate | 0.0019                    | 0.0019    | 0.0295    | 0.0000    | 0.0000    |
| Diglycerol         | 0.4471                    | 0.4471    | 0.0000    | 0.4772    | 0.0002    |
| Triglycerol        | 0.1294                    | 0.1294    | 0.0000    | 0.1381    | 0.0000    |
| Tetraglycerol      | 0.0705                    | 0.0705    | 0.0000    | 0.0752    | 0.0000    |
| Larger oligomers   | 0.0837                    | 0.0837    | 0.0000    | 0.0893    | 0.0000    |

**Table S.3.** Process streams for the maximum triglycerol production configuration  
(continuation).

| <b>Stream</b>      | <b>22</b> | <b>23</b>                | <b>24</b> | <b>25</b> | <b>26</b> |
|--------------------|-----------|--------------------------|-----------|-----------|-----------|
| Temperature (°C)   | 185.8     | 185.8                    | 25.0      | 25.04     | 0.2116    |
| Pressure (kPa)     | 3         | 3                        | 3         | 101.3     | 101.3     |
| Vapor fraction     | 1         | 0.7824                   | 0         | 0         | 0         |
| Flow rate (kg/h)   | 388.7     | 9.036 x 10 <sup>-2</sup> | 388.7     | 388.7     | 0.3821    |
| Enthalpy (kcal/kg) | -1462     | -1043                    | -1759     | -1759     | -3804     |
| Mass fractions     |           |                          |           |           |           |
| Glycerol           | 1.0000    | 0.0000                   | 1.0000    | 1.0000    | 0.0000    |
| Argon              | 0.0000    | 0.0000                   | 0.0000    | 0.0000    | 0.0000    |
| Water              | 0.0000    | 0.2222                   | 0.0000    | 0.0000    | 1.0000    |
| Cesium bicarbonate | 0.0000    | 0.0021                   | 0.0000    | 0.0000    | 0.0000    |
| Diglycerol         | 0.0000    | 0.7756                   | 0.0000    | 0.0000    | 0.0000    |
| Triglycerol        | 0.0000    | 0.0001                   | 0.0000    | 0.0000    | 0.0000    |
| Tetraglycerol      | 0.0000    | 0.0000                   | 0.0000    | 0.0000    | 0.0000    |
| Larger oligomers   | 0.0000    | 0.0000                   | 0.0000    | 0.0000    | 0.0000    |
| <b>Stream</b>      | <b>27</b> | <b>28</b>                | <b>29</b> | <b>30</b> | <b>31</b> |
| Temperature (°C)   | 25        | 267                      | 167.7     | 152.8     | 183.0     |
| Pressure (kPa)     | 101.3     | 3                        | 0.05      | 0.05      | 0.05      |
| Vapor fraction     | 0         | 0                        | 0.6990    | 1         | 0         |
| Flow rate (kg/h)   | 389.1     | 1378                     | 1378      | 843.0     | 534.6     |
| Enthalpy (kcal/kg) | -1761     | -410.7                   | -410.7    | -380.1    | -456.7    |
| Mass fractions     |           |                          |           |           |           |
| Glycerol           | 0.9990    | 0.0000                   | 0.0000    | 0.0001    | 0.0000    |
| Argon              | 0.0000    | 0.0000                   | 0.0000    | 0.0000    | 0.0000    |
| Water              | 0.0010    | 0.0000                   | 0.0000    | 0.0000    | 0.0000    |
| Cesium bicarbonate | 0.0000    | 0.0000                   | 0.0000    | 0.0000    | 0.0000    |
| Diglycerol         | 0.0000    | 0.6118                   | 0.6118    | 0.9998    | 0.0001    |
| Triglycerol        | 0.0000    | 0.1771                   | 0.1771    | 0.0001    | 0.4562    |
| Tetraglycerol      | 0.0000    | 0.0965                   | 0.0965    | 0.0000    | 0.2486    |
| Larger oligomers   | 0.0000    | 0.1145                   | 0.1145    | 0.0000    | 0.2952    |
| <b>Stream</b>      | <b>32</b> | <b>33</b>                | <b>34</b> | <b>35</b> | <b>36</b> |
| Temperature (°C)   | 124.7     | 250                      | 126.6     | 283.4     | 280.7     |
| Pressure (kPa)     | 0.001     | 0.001                    | 0.001     | 0.001     | 0.001     |
| Vapor fraction     | 0         | 0.6392                   | 1         | 0         | 1         |
| Flow rate (kg/h)   | 534.6     | 534.6                    | 243.9     | 290.6     | 132.9     |
| Enthalpy (kcal/kg) | -456.7    | -378.4                   | -392.9    | -422.0    | -337.9    |
| Mass fractions     |           |                          |           |           |           |
| Glycerol           | 0.0000    | 0.0000                   | 0.0000    | 0.0000    | 0.0000    |
| Argon              | 0.0000    | 0.0000                   | 0.0000    | 0.0000    | 0.0000    |
| Water              | 0.0000    | 0.0000                   | 0.0000    | 0.0000    | 0.0000    |
| Cesium bicarbonate | 0.0000    | 0.0000                   | 0.0000    | 0.0000    | 0.0000    |
| Diglycerol         | 0.0001    | 0.0001                   | 0.0001    | 0.0000    | 0.0000    |
| Triglycerol        | 0.4562    | 0.4562                   | 0.9997    | 0.0001    | 0.0001    |
| Tetraglycerol      | 0.2486    | 0.2486                   | 0.0001    | 0.4571    | 0.9997    |
| Larger oligomers   | 0.2952    | 0.2952                   | 0.0000    | 0.5429    | 0.0001    |

**Table S.3.** Process streams for the maximum triglycerol production configuration (continuation).

| Stream             | 37     |
|--------------------|--------|
| Temperature (°C)   | 322.3  |
| Pressure (kPa)     | 0.001  |
| Vapor fraction     | 0.0000 |
| Flow rate (kg/h)   | 157.8  |
| Enthalpy (kcal/kg) | -398.1 |
| Mass fractions     |        |
| Glycerol           | 0.0000 |
| Argon              | 0.0000 |
| Water              | 0.0000 |
| Cesium bicarbonate | 0.0000 |
| Diglycerol         | 0.0000 |
| Triglycerol        | 0.0000 |
| Tetraglycerol      | 0.0001 |
| Larger oligomers   | 0.9999 |

### S.5- The effects of vacuum distillation on the costs of the distillation columns

Vacuum distillation affects the costs of the columns in two ways: by adding an additional thickness to the column vessel, which contributes to its weight and, therefore, to its cost; and by the necessity to account for a specific device for vacuum generation.

According to Seider et al.,<sup>1</sup> the thickness of the columns can be calculated with the following equations:

$$t_s = t_v + t_c \quad (\text{S.3})$$

$$t_v = 1.3D_o \left( \frac{PL}{E_M D_o} \right)^{0.4} + t_{vc} \quad (\text{S.4})$$

$$t_{vc} = L(0.18D_i - 2.2) \times 10^{-5} - 0.19 \quad (\text{S.5})$$

where  $t_s$  is the column shell thickness (according to the authors, it is sufficient for cost-estimation purposes to assume the thicknesses of the two heads to be equal to the shell thickness);  $t_v$  is the primary wall thickness of the vessel, which is a function of the design pressure  $P$ , in psi, the length-to-outside diameter ratio  $L/D_o$ , and the modulus of

elasticity,  $E_M$ , in psi, which depends on temperature;  $t_{vc}$  is a correction in terms of length,  $L$ , and inside diameter,  $D_i$ ; and  $t_c$  is a corrosion allowance of 1/8 in that must be added to  $t_v$  even for noncorrosive conditions.

Vacuum is generated with a device such as (multi)stage steam-jet ejectors, (multi)stage liquid-ring pumps and dry vacuum pumps. For the volume flow rates and pressures observed in the columns of this work, devices of the first type are recommended.<sup>1</sup> Then, their costs can be calculated with the following equation:

$$C_{vacuum} = F_{MS} \times 1,915 \times \left(\frac{Q}{P}\right)^{0.41} \quad (S.6)$$

where  $Q$  is the suction volume flow rate in lb/h;  $P$  is the suction pressure, in torr; and  $F_{MS}$  is a multistage factor which is 1.8 for two stages (suction pressure limit of 15 torr or ~ 0.0200 bar) and 2.1 for three stages (suction pressure limit of 2 torr or ~ 0.0027 bar).<sup>1</sup>

With Equation S.6, the costs presented in Table S.4 were calculated for the vacuum apparatus associated to every column.

**Table S.4.** Participation of the vacuum apparatus in the cost of the distillation columns.

|                         | <b>Maximum production of diglycerol</b>  |            |              |              |              |
|-------------------------|------------------------------------------|------------|--------------|--------------|--------------|
|                         | T-100                                    | T-101      | T-102        | T-103        |              |
| Total cost <sup>a</sup> | 176,008.45                               | 688,637.28 | 2,363,354.79 | 404,505.43   |              |
| Vacuum apparatus        | 76,323.69                                | 107,736.52 | 103,226.15   | 358,849.05   |              |
| Percentage <sup>b</sup> | 17.79%                                   |            |              |              |              |
|                         | <b>Maximum production of triglycerol</b> |            |              |              |              |
|                         | T-100                                    | T-101      | T-102        | T-103        | T-104        |
| Total cost <sup>a</sup> | 151,295.19                               | 240,445.79 | 4,041,126.21 | 1,874,337.77 | 2,713,839.98 |
| Vacuum apparatus        | 61,164.54                                | 85,702.19  | 483,861.14   | 1,632,362.99 | 1,271,312.46 |
| Percentage <sup>b</sup> | 39.18%                                   |            |              |              |              |

<sup>a</sup> Including condenser and reboiler.

<sup>b</sup> Sum of the costs of all vacuum apparatuses divided by the sum of the total costs of all columns.

## References

- 1 W. D. Seider, D. R. Lewin, J. D. Seader, S. Widagdo, R. Gani and K. M. Ng, *Product and Process Design Principles: Synthesis, Analysis and Evaluation*, 4<sup>th</sup> edn., John Wiley & Sons Inc., New York, United States, 2017.
- 2 R. Turton, R. Bailie, W. Whiting and J. Shaeiwitz, *Analysis, Synthesis and Design of Chemical Processes*, Prentice Hall, Boston, United States, 2008.
- 3 M. Richter, Y. K. Krisnandi, R. Eckelt and A. Martin, *Catal. Commun.*, 2008, **9**, 2112–2116.
